# Supplementary material for: Seaweed Extracts to Control Postharvest Phytopathogenic Fungi in Rocha Pear
Source: MDPI journal article supplement (doi:10.3390/jof9020269), 2023-02-17
Supplement: s1 [file s1]

## Supplementary Materials Content

**Page 2 - Table S1:** Mycelial growth inhibition rate (GIR) in mm/h obtained in the Poisoned food technique assays by the extracts (n-hexane, ethyl acetate, aqueous, ethanolic and hidroethanolic) of *Asparagopsis armata*, *Codium* sp., *Fucus vesiculosus* and *Sargassum muticum* at 0.1, 0.5 and 1 mg/mL against *Alternaria alternata*, *Botrytis cinerea*, *Fusarium oxysporum* and *Penicillium expansum*. The result obtained for the amphotericin B (growth inhibition control) at 30 µg/mL are also presented. The GIR followed by the confidence range [CI95] and where possible, the inhibition percentage in comparison with the control growth rate (CGR), are indicated. Also, those conditions which don't follow a linear inhibition and don't adjust to the model are indicated as "n.s." (non-significant) and those extracts that led to a higher growth rate are illustrated as "g.s." (growth stimulant);

**Page 12 - Figure S1:** Representative examples of the spore germination inhibition of *Botrytis cinerea* by the n-hexane, ethyl acetate and ethanolic extracts of *Asparagopsis armata*. A and B are the MIC x 2 results, A.1: DMSO control (1 mg/mL); A.2: amphotericin B control (2 µg/mL), B.1: ethyl acetate (1 mg/mL) and B.2: ethanol (1 mg/mL). The letters a and b are the MFC and MFC x 2 results, a.1: DMSO control (0.5 mg/mL); a.2: DMSO control (1 mg/mL); a.3: amphotericin B control (2 µg/mL), b.1: n-hexane (1 mg/mL); b.2: ethyl acetate (1 mg/mL); b.3: ethanol (0.5 mg/mL) and b.4: ethanol (1 mg/mL);

**Page 12 - Figure S2:** Representative examples of the spore germination inhibition of *Fusarium oxysporum* by the n-hexane, ethyl acetate and ethanolic extracts of *Asparagopsis armata*. A and B are the MIC x 2 results, A.1: DMSO control (1 mg/mL); A.2: amphotericin B control (2 µg/mL), B.1: n-hexane (1 mg/mL) and B.2: ethyl acetate (1 mg/mL). The letters a and b are the MFC and MFC x 2 results, following the same correspondence of codes described for the MICs;

**Page 13 - Figure S3:** FTIR-ATR spectroscopy spectra of the ethyl acetate (a), ethanolic (b), and n-hexane (c) extracts of *Asparagopsis armata* (AA) and the aqueous extract (AQ) of *Sargassum muticum* (d);

**Page 13 - Table S2:** Estimates model table for the relationship between decay halo's growth, time and treatments with the seaweeds' aqueous extracts against *Botrytis cinerea*. The ratio at which the curves vary depending on the treatments used and the influence of time (Estimate) are represented, followed by the standard error (Std. Error), t and p values, the estimates with the influence of the control (Value), the same value without the logarithm (Linear value) and the percentage of the stimulant (positive) or inhibitory (negative) effect on the fruit decay in comparison with the control. Negative percentages represent decay stimulation. Furthermore, significant differences are indicated with asterisks, where \* p < 0.05, \*\* p < 0.01 and \*\*\* p < 0.001;

**Page 14 - Table S3:** Estimates model table for the relationship between decay halo's growth, time and treatments with the seaweeds' aqueous ex-tracts against *Fusarium oxysporum*. The ratio at which the curves vary depending on the treatments used and the influence of time (Estimate) are represented, followed by the standard error (Std. Error), t and p values, the estimates with the influence of the control (Value), the same value without the logarithm (Linear value) and the percentage of the stimulant (positive) or inhibitory (negative) effect on the fruit decay in comparison with the control. Negative percentages represent decay stimulation. Furthermore, significant differences are indicated with asterisks, where \* p < 0.05, \*\* p < 0.01 and \*\*\* p < 0.001.

**Table S1.** Mycelial growth inhibition rate (GIR) in mm/h obtained in the Poisoned food technique assays by the extracts (*n*-hexane, ethyl acetate, aqueous, ethanolic and hidroethanolic) of *Asparagopsis armata*, *Codium* sp., *Fucus vesiculosus* and *Sargassum muticum* at 0.1, 0.5 and 1 mg/mL against *Alternaria alternata*, *Botrytis cinerea*, *Fusarium oxysporum* and *Penicillium expansum*. The result obtained for the amphotericin B (growth inhibition control) at 30 µg/mL are also presented. The GIR followed by the confidence range [CI95] and where possible, the inhibition percentage in comparison with the control growth rate (CGR), are indicated. Also, those conditions which don't follow a linear inhibition and don't adjust to the model are indicated as "n.s." (non-significant) and those extracts that led to a higher growth rate are illustrated as "g.s." (growth stimulant).

| Mycelial growth inhibition rate |                   |                         |                           |                       |                       |                            |                |
|---------------------------------|-------------------|-------------------------|---------------------------|-----------------------|-----------------------|----------------------------|----------------|
| <i>Fungi</i>                    | Seaweed           | GCR (mm/h)              | Amphotericin B (30 µg/mL) | Extract               | Concentration (mg/mL) | GIR (mm/h) (CI95)          | Inhibition (%) |
| <i>A. alternata</i>             | <i>A. armata</i>  | 0.1351 (0.1274, 0.1428) | 0.1181 (0.1131, 0.1232)   | <i>n</i> -hexane      | 0.1                   | -0.0413 (-0.0496, -0.0330) | g.s.           |
|                                 |                   |                         |                           |                       | 0.5                   | -0.0478 (-0.0509, -0.0447) | g.s.           |
|                                 |                   |                         |                           |                       | 1                     | -0.0065 (-0.0100, -0.0029) | g.s.           |
|                                 |                   |                         |                           | Ethyl acetate         | 0.1                   | -0.0202 (-0.0254, -0.0151) | g.s.           |
|                                 |                   |                         |                           |                       | 0.5                   | -0.0235 (-0.0273, -0.0197) | g.s.           |
|                                 |                   |                         |                           |                       | 1                     | -0.0164 (-0.0211, -0.0117) | g.s.           |
|                                 |                   |                         |                           | EtOH                  | 0.1                   | -0.0131 (-0.0182, -0.0081) | g.s.           |
|                                 |                   |                         |                           |                       | 0.5                   | -0.0676 (-0.0751, -0.0601) | g.s.           |
|                                 |                   |                         |                           |                       | 1                     | -0.0492 (-0.0536, -0.0447) | g.s.           |
|                                 |                   |                         |                           | EtOH:H <sub>2</sub> O | 0.1                   | -0.0298 (-0.0331, -0.0264) | g.s.           |
|                                 |                   |                         |                           |                       | 0.5                   | -0.0592 (-0.0639, -0.0546) | g.s.           |
|                                 |                   |                         |                           |                       | 1                     | -0.0525 (-0.0582, -0.0468) | g.s.           |
|                                 |                   |                         |                           | H <sub>2</sub> O      | 0.1                   | -0.0090 (-0.0168, -0.0012) | g.s.           |
|                                 |                   |                         |                           |                       | 0.5                   | -0.0370 (-0.0421, -0.0320) | g.s.           |
|                                 |                   |                         |                           |                       | 1                     | -0.0465 (-0.0536, -0.0394) | g.s.           |
|                                 | <i>Codium</i> sp. | 0.1351 (0.1274, 0.1428) | 0.1181 (0.1131, 0.1232)   | <i>n</i> -hexane      | 0.1                   | -0.0250 (-0.0343, -0.0157) | g.s.           |
|                                 |                   |                         |                           |                       | 0.5                   | -0.0448 (-0.0519, -0.0377) | g.s.           |
|                                 |                   |                         |                           |                       | 1                     | -0.0280 (-0.0317, -0.0244) | g.s.           |
|                                 |                   |                         |                           | Ethyl acetate         | 0.1                   | -0.0090 (-0.0135, -0.0046) | g.s.           |
|                                 |                   |                         |                           |                       | 0.5                   | -0.0220 (-0.0281, -0.0158) | g.s.           |

| <i>Fungi</i>        | <i>Seaweed</i>        | GCR (mm/h)              | Amphotericin B (30 µg/mL) | Extract               | Concentration (mg/mL) | GIR (mm/h) (CI95)          | Inhibition (%) |
|---------------------|-----------------------|-------------------------|---------------------------|-----------------------|-----------------------|----------------------------|----------------|
| <i>A. alternata</i> | <i>Codium</i> sp.     | 0.1351 (0.1274, 0.1428) | 0.1181 (0.1131, 0.1232)   | Ethyl acetate         | 1                     | 0.0066 (-0.0017, 0.0149)   | n.s.           |
|                     |                       |                         |                           | EtOH                  | 0.1                   | -0.0093 (-0.0138, -0.0048) | g.s.           |
|                     |                       |                         |                           |                       | 0.5                   | -0.0604 (-0.0686, -0.0522) | g.s.           |
|                     |                       |                         |                           |                       | 1                     | -0.0216 (-0.0349, -0.0083) | g.s.           |
|                     |                       |                         |                           | EtOH:H <sub>2</sub> O | 0.1                   | -0.0161 (-0.0215, -0.0108) | g.s.           |
|                     |                       |                         |                           |                       | 0.5                   | -0.0361 (-0.0442, -0.0280) | g.s.           |
|                     |                       |                         |                           |                       | 1                     | -0.0354 (-0.0410, -0.0299) | g.s.           |
|                     |                       |                         |                           | H <sub>2</sub> O      | 0.1                   | 0.0389 (0.0151, 0.0627)    | 29.3665        |
|                     |                       |                         |                           |                       | 0.5                   | 0.0216 (-0.0067, 0.0499)   | n.s.           |
|                     |                       |                         |                           |                       | 1                     | -0.0091 (-0.0148, -0.0033) | g.s.           |
|                     | <i>F. vesiculosus</i> | 0.1006 (0.0967, 0.1045) | 0.0888 (0.0860, 0.0915)   | <i>n</i> -hexane      | 0.1                   | -0.0254 (-0.0312, -0.0196) | g.s.           |
|                     |                       |                         |                           |                       | 0.5                   | -0.0311 (-0.0401, -0.0220) | g.s.           |
|                     |                       |                         |                           |                       | 1                     | -0.0057 (-0.0141, 0.0026)  | n.s.           |
|                     |                       |                         |                           | Ethyl acetate         | 0.1                   | 0.0005 (-0.0062, 0.0071)   | n.s.           |
|                     |                       |                         |                           |                       | 0.5                   | -0.0095 (-0.0183, -0.0007) | g.s.           |
|                     |                       |                         |                           |                       | 1                     | 0.0070 (-0.0002, 0.0141)   | n.s.           |
|                     |                       |                         |                           | EtOH                  | 0.1                   | 0.0051 (-0.0021, 0.0123)   | n.s.           |
|                     |                       |                         |                           |                       | 0.5                   | -0.0123 (-0.0211, -0.0035) | g.s.           |
|                     |                       |                         |                           |                       | 1                     | -0.0191 (-0.0259, -0.0122) | g.s.           |
|                     |                       |                         |                           | EtOH:H <sub>2</sub> O | 0.1                   | 0.0131 (0.0082, 0.0181)    | 13.0517        |
|                     |                       |                         |                           |                       | 0.5                   | -0.0291 (-0.0349, -0.0233) | g.s.           |
|                     |                       |                         |                           |                       | 1                     | -0.0237 (-0.0291, -0.0183) | g.s.           |
|                     |                       |                         |                           | H <sub>2</sub> O      | 0.1                   | -0.0264 (-0.0329, -0.0199) | g.s.           |
|                     |                       |                         |                           |                       | 0.5                   | -0.0318 (-0.0388, -0.0247) | g.s.           |
|                     |                       |                         |                           |                       | 1                     | -0.0752 (-0.0831, -0.0674) | g.s.           |
|                     | <i>S. muticum</i>     | 0.1006 (0.0967, 0.1045) | 0.0888 (0.0860, 0.0915)   | <i>n</i> -hexane      | 0.1                   | -0.0291 (-0.0368, -0.0215) | g.s.           |

| <i>Fungi</i>        | <i>Seaweed</i>    | GCR (mm/h)              | Amphotericin B (30 µg/mL) | Extract               | Concentration (mg/mL) | GIR (mm/h) (CI95)          | Inhibition (%) |
|---------------------|-------------------|-------------------------|---------------------------|-----------------------|-----------------------|----------------------------|----------------|
| <i>A. alternata</i> | <i>S. muticum</i> | 0.1006 (0.0967, 0.1045) | 0.0888 (0.0860, 0.0915)   | <i>n</i> -hexane      | 0.5                   | -0.0528 (-0.0570, -0.0487) | g.s.           |
|                     |                   |                         |                           |                       | 1                     | -0.0135 (-0.0171, -0.0099) | g.s.           |
|                     |                   |                         |                           | Ethyl acetate         | 0.1                   | -0.0364 (-0.0428, -0.0210) | g.s.           |
|                     |                   |                         |                           |                       | 0.5                   | -0.0552 (-0.0595, -0.0509) | g.s.           |
|                     |                   |                         |                           |                       | 1                     | -0.0421 (-0.0467, -0.0374) | g.s.           |
|                     |                   |                         |                           | EtOH                  | 0.1                   | -0.0404 (-0.0448, -0.0360) | g.s.           |
|                     |                   |                         |                           |                       | 0.5                   | -0.0636 (-0.0676, -0.0597) | g.s.           |
|                     |                   |                         |                           |                       | 1                     | -0.0408 (-0.0440, -0.0376) | g.s.           |
|                     |                   |                         |                           | EtOH:H <sub>2</sub> O | 0.1                   | 0.0258 (0.0227, 0.0289)    | 25.6362        |
|                     |                   |                         |                           |                       | 0.5                   | -0.0225 (-0.0272, -0.0179) | g.s.           |
|                     |                   |                         |                           |                       | 1                     | -0.0073 (-0.0103, -0.0043) | g.s.           |
|                     |                   |                         |                           | H <sub>2</sub> O      | 0.1                   | -0.0463 (-0.0544, -0.0381) | g.s.           |
| <i>B. cinerea</i>   | <i>A. armata</i>  | 0.2181 (0.2040, 0.2321) | 0.1417 (0.1345, 0.1488)   | <i>n</i> -hexane      | 0.1                   | 0.0066 (-0.0093, 0.0224)   | 3.0073         |
|                     |                   |                         |                           |                       | 0.5                   | 0.0833 (0.0691, 0.0976)    | 38.2072        |
|                     |                   |                         |                           |                       | 1                     | 0.1206 (0.1014, 0.1398)    | 55.2957        |
|                     |                   |                         |                           | Ethyl acetate         | 0.1                   | 0.0123 (-0.0004, 0.0250)   | n.s.           |
|                     |                   |                         |                           |                       | 0.5                   | 0.0762 (0.0526, 0.0997)    | 34.9198        |
|                     |                   |                         |                           |                       | 1                     | 0.1516 (0.1425, 0.1607)    | 69.5094        |
|                     |                   |                         |                           | EtOH                  | 0.1                   | 0.0613 (0.0454, 0.0772)    | 28.1247        |
|                     |                   |                         |                           |                       | 0.5                   | 0.1118 (0.0987, 0.1249)    | 51.2609        |
|                     |                   |                         |                           |                       | 1                     | 0.1109 (0.0898, 0.1319)    | 50.8482        |
|                     |                   |                         |                           | EtOH:H <sub>2</sub> O | 0.1                   | 0.0424 (0.0308, 0.0540)    | 19.4223        |
|                     |                   |                         |                           |                       | 0.5                   | 0.0720 (0.0437, 0.1003)    | 33.0078        |
|                     |                   |                         |                           |                       | 1                     | 0.1475 (0.1400, 0.1549)    | 67.6295        |

| <i>Fungi</i>      | <i>Seaweed</i>        | GCR (mm/h)              | Amphotericin B (30 µg/mL) | Extract               | Concentration (mg/mL) | GIR (mm/h) (CI95)          | Inhibition (%) |
|-------------------|-----------------------|-------------------------|---------------------------|-----------------------|-----------------------|----------------------------|----------------|
| <i>B. cinerea</i> | <i>A. armata</i>      | 0.2181 (0.2040, 0.2321) | 0.1417 (0.1345, 0.1488)   | H <sub>2</sub> O      | 0.1                   | -0.0287 (-0.0347, -0.0227) | g.s.           |
|                   |                       |                         |                           |                       | 0.5                   | -0.0357 (-0.0473, -0.0241) | g.s.           |
|                   |                       |                         |                           |                       | 1                     | -0.0394 (-0.0490, -0.0297) | g.s.           |
|                   | <i>Codium</i> sp.     | 0.2181 (0.2040, 0.2321) | 0.1417 (0.1345, 0.1488)   | <i>n</i> -hexane      | 0.1                   | -0.0238 (-0.0373, -0.0102) | g.s.           |
|                   |                       |                         |                           |                       | 0.5                   | 0.0030 (-0.0063, 0.0123)   | n.s.           |
|                   |                       |                         |                           |                       | 1                     | 0.0289 (0.0234, 0.0344)    | 13.2691        |
|                   |                       |                         |                           | Ethyl acetate         | 0.1                   | 0.0005 (-0.0110, 0.0119)   | n.s.           |
|                   |                       |                         |                           |                       | 0.5                   | 0.0245 (0.0107, 0.0384)    | 11.2517        |
|                   |                       |                         |                           |                       | 1                     | 0.0269 (0.0175, 0.0362)    | 12.3109        |
|                   |                       |                         |                           | EtOH                  | 0.1                   | -0.0389 (-0.0608, -0.0170) | g.s.           |
|                   |                       |                         |                           |                       | 0.5                   | -0.0324 (-0.0455, -0.0193) | g.s.           |
|                   |                       |                         |                           |                       | 1                     | -0.0299 (-0.0388, -0.0210) | g.s.           |
|                   |                       |                         |                           | EtOH:H <sub>2</sub> O | 0.1                   | 0.0095 (-0.0016, 0.0206)   | g.s.           |
|                   |                       |                         |                           |                       | 0.5                   | -0.0056 (-0.0128, 0.0017)  | g.s.           |
|                   |                       |                         |                           |                       | 1                     | 0.0107 (-0.0027, 0.0240)   | g.s.           |
|                   |                       |                         |                           | H <sub>2</sub> O      | 0.1                   | -0.0234 (-0.0340, -0.0128) | n.s.           |
|                   |                       |                         |                           |                       | 0.5                   | -0.0482 (-0.0630, -0.0333) | n.s.           |
|                   |                       |                         |                           |                       | 1                     | -0.0579 (-0.0802, -0.0356) | n.s.           |
|                   | <i>F. vesiculosus</i> | 0.2294 (0.2201, 0.2387) | 0.1711 (0.1587, 0.1834)   | <i>n</i> -hexane      | 0.1                   | 0.0130 (-0.0066, 0.0325)   | n.s.           |
|                   |                       |                         |                           |                       | 0.5                   | 0.0644 (0.0590, 0.0697)    | 28.0514        |
|                   |                       |                         |                           |                       | 1                     | 0.0977 (0.0859, 0.1095)    | 42.5850        |
|                   |                       |                         |                           | Ethyl acetate         | 0.1                   | 0.0199 (0.0116, 0.0282)    | 8.6792         |
|                   |                       |                         |                           |                       | 0.5                   | 0.0317 (0.0209, 0.0426)    | 13.8230        |
|                   |                       |                         |                           |                       | 1                     | 0.0384 (0.0306, 0.0462)    | 16.7524        |
|                   |                       |                         |                           | EtOH                  | 0.1                   | -0.0148 (-0.0222, -0.0074) | g.s.           |
|                   |                       |                         |                           |                       | 0.5                   | -0.0032 (-0.0110, 0.0045)  | n.s.           |

| <i>Fungi</i>        | <i>Seaweed</i>        | GCR (mm/h)              | Amphotericin B (30 µg/mL) | Extract               | Concentration (mg/mL) | GIR (mm/h) (CI95)          | Inhibition (%) |
|---------------------|-----------------------|-------------------------|---------------------------|-----------------------|-----------------------|----------------------------|----------------|
| <i>B. cinerea</i>   | <i>F. vesiculosus</i> | 0.2294 (0.2201, 0.2387) | 0.1711 (0.1587, 0.1834)   | EtOH                  | 1                     | 0.0009 (-0.0061, 0.0079)   | n.s.           |
|                     |                       |                         |                           | EtOH:H <sub>2</sub> O | 0.1                   | 0.0183 (0.0072, 0.0294)    | 7.9730         |
|                     |                       |                         |                           |                       | 0.5                   | 0.0102 (0.0049, 0.0155)    | 4.4420         |
|                     |                       |                         |                           |                       | 1                     | 0.0037 (-0.0008, 0.0082)   | n.s.           |
|                     |                       |                         |                           | H <sub>2</sub> O      | 0.1                   | 0.1380 (0.1167, 0.1592)    | 60.1569        |
|                     |                       |                         |                           |                       | 0.5                   | 0.0993 (0.0728, 0.1258)    | 43.2912        |
|                     |                       |                         |                           |                       | 1                     | 0.0644 (0.0394, 0.0893)    | 28.0514        |
|                     | <i>S. muticum</i>     | 0.2181 (0.2040, 0.2321) | 0.1417 (0.1345, 0.1488)   | <i>n</i> -hexane      | 0.1                   | 0.0127 (-0.0095, 0.0350)   | n.s.           |
|                     |                       |                         |                           |                       | 0.5                   | 0.0130 (-0.0058, 0.0317)   | n.s.           |
|                     |                       |                         |                           |                       | 1                     | 0.0625 (0.0516, 0.0734)    | 27.2450        |
|                     |                       | 0.2294 (0.2201, 0.2387) | 0.1711 (0.1587, 0.1834)   | Ethyl acetate         | 0.1                   | -0.0097 (-0.0206, 0.0011)  | n.s.           |
|                     |                       |                         |                           |                       | 0.5                   | 0.0308 (0.0201, 0.0415)    | 13.4220        |
|                     |                       |                         |                           |                       | 1                     | 0.0417 (0.0362, 0.0471)    | 18.1648        |
|                     |                       |                         |                           | EtOH                  | 0.1                   | 0.0380 (0.0273, 0.0486)    | n.s.           |
|                     |                       |                         |                           |                       | 0.5                   | 0.0488 (0.0377, 0.0600)    | 21.2903        |
|                     |                       |                         |                           |                       | 1                     | 0.0255 (0.0176, 0.0333)    | 11.0985        |
|                     |                       |                         |                           | EtOH:H <sub>2</sub> O | 0.1                   | 0.0030 (-0.0112, 0.0172)   | n.s.           |
|                     |                       |                         |                           |                       | 0.5                   | -0.0056 (-0.0114, 0.0003)  | n.s.           |
|                     |                       |                         |                           |                       | 1                     | -0.0271 (-0.0406, -0.0136) | g.s.           |
|                     |                       |                         |                           | H <sub>2</sub> O      | 0.1                   | -0.0058 (-0.0218, 0.0102)  | g.s.           |
|                     |                       |                         |                           |                       | 0.5                   | -0.0206 (-0.0312, -0.0010) | g.s.           |
|                     |                       |                         |                           |                       | 1                     | -0.0213 (-0.0335, -0.0091) | g.s.           |
| <i>F. oxysporum</i> | <i>A. armata</i>      | 0.1870 (0.1772, 0.1967) | 0.1412 (0.1277, 0.1547)   | <i>n</i> -hexane      | 0.1                   | 0.0330 (0.0220, 0.0441)    | 17.6684        |
|                     |                       |                         |                           |                       | 0.5                   | 0.0435 (0.0291, 0.0579)    | 23.2620        |
|                     |                       |                         |                           |                       | 1                     | 0.0733 (0.0637, 0.0829)    | 39.1765        |
|                     |                       |                         |                           | Ethyl acetate         | 0.1                   | 0.0243 (0.0158, 0.0329)    | 13.0160        |

| <i>Fungi</i>        | <i>Seaweed</i>    | GCR (mm/h)              | Amphotericin B (30 µg/mL) | Extract               | Concentration (mg/mL) | GIR (mm/h) (CI95)          | Inhibition (%) |
|---------------------|-------------------|-------------------------|---------------------------|-----------------------|-----------------------|----------------------------|----------------|
| <i>F. oxysporum</i> | <i>A. armata</i>  | 0.1870 (0.1772, 0.1967) | 0.1412 (0.1277, 0.1547)   | Ethyl acetate         | 0.5                   | 0.0733 (0.0628, 0.0838)    | 39.1765        |
|                     |                   |                         |                           |                       | 1                     | 0.0696 (0.0564, 0.0828)    | 37.2193        |
|                     |                   |                         |                           | EtOH                  | 0.1                   | 0.0037 (-0.0026, 0.0099)   | n.s.           |
|                     |                   |                         |                           |                       | 0.5                   | 0.0163 (0.0104, 0.0223)    | 8.7326         |
|                     |                   |                         |                           |                       | 1                     | 0.0150 (0.0056, 0.0243)    | 8.0000         |
|                     |                   |                         |                           | EtOH:H <sub>2</sub> O | 0.1                   | 0.0106 (0.0032, 0.0181)    | 5.6738         |
|                     |                   |                         |                           |                       | 0.5                   | 0.0282 (0.0195, 0.0369)    | 15.0588        |
|                     |                   |                         |                           |                       | 1                     | 0.0169 (0.0061, 0.0277)    | 9.0214         |
|                     |                   |                         |                           | H <sub>2</sub> O      | 0.1                   | 0.0098 (0.0054, 0.0142)    | 5.2642         |
|                     |                   |                         |                           |                       | 0.5                   | 0.0053 (0.0004, 0.0106)    | 2.8567         |
|                     |                   |                         |                           |                       | 1                     | -0.0002 (-0.0055, 0.0052)  | n.s.           |
| <i>F. oxysporum</i> | <i>Codium</i> sp. | 0.187 (0.1772, 0.1967)  | 0.1412 (0.1277, 0.1547)   | <i>n</i> -hexane      | 0.1                   | -0.0106 (-0.0190, -0.0022) | g.s.           |
|                     |                   |                         |                           |                       | 0.5                   | 0.0098 (0.0027, 0.0170)    | 4.8995         |
|                     |                   |                         |                           |                       | 1                     | 0.0139 (0.0039, 0.0239)    | 6.9104         |
|                     |                   |                         |                           | Ethyl acetate         | 0.1                   | -0.0033 (-0.0109, 0.0043)  | n.s.           |
|                     |                   |                         |                           |                       | 0.5                   | 0.0181 (0.0111, 0.0250)    | 8.9851         |
|                     |                   |                         |                           |                       | 1                     | 0.0217 (0.0129, 0.0305)    | 10.8060        |
|                     |                   |                         |                           | EtOH                  | 0.1                   | -0.0073 (-0.0164, 0.0017)  | g.s.           |
|                     |                   |                         |                           |                       | 0.5                   | 0.0130 (0.0093, 0.0167)    | g.s.           |
|                     |                   |                         |                           |                       | 1                     | 0.0095 (0.0022, 0.0168)    | g.s.           |
|                     |                   |                         |                           | EtOH:H <sub>2</sub> O | 0.1                   | -0.0018 (-0.0100, 0.0065)  | n.s.           |
|                     |                   |                         |                           |                       | 0.5                   | 0.0093 (0.0035, 0.0152)    | 6.4726         |
|                     |                   |                         |                           |                       | 1                     | 0.0037 (-0.0053, 0.0126)   | 4.7114         |
|                     |                   |                         |                           | H <sub>2</sub> O      | 0.1                   | -0.0086 (-0.0136, -0.0036) | n.s.           |
|                     |                   |                         |                           |                       | 0.5                   | -0.0165 (-0.0207, -0.0124) | 4.6483         |
|                     |                   |                         |                           |                       | 1                     | -0.0157 (-0.0194, -0.0120) | n.s.           |

| <i>Fungi</i>        | Seaweed               | GCR (mm/h)              | Amphotericin B (30 $\mu$ g/mL) | Extract               | Concentration (mg/mL) | GIR (mm/h) (CI95)          | Inhibition (%) |
|---------------------|-----------------------|-------------------------|--------------------------------|-----------------------|-----------------------|----------------------------|----------------|
| <i>F. oxysporum</i> | <i>F. vesiculosus</i> | 0.1994 (0.1878, 0.2110) | 0.1447 (0.1294, 0.1600)        | <i>n</i> -hexane      | 0.1                   | 0.0037 (-0.0021, 0.0096)   | 1.8626         |
|                     |                       |                         |                                |                       | 0.5                   | 0.0390 (0.0316, 0.0464)    | 19.5587        |
|                     |                       |                         |                                |                       | 1                     | 0.0253 (0.0170, 0.0336)    | 12.7081        |
|                     |                       |                         |                                | Ethyl acetate         | 0.1                   | 0.0015 (-0.0021, 0.0050)   | n.s.           |
|                     |                       |                         |                                |                       | 0.5                   | 0.0015 (-0.0024, 0.0053)   | n.s.           |
|                     |                       |                         |                                |                       | 1                     | 0.0084 (0.0018, 0.0150)    | 4.2096         |
|                     |                       |                         |                                | EtOH                  | 0.1                   | -0.0014 (-0.0051, 0.0024)  | n.s.           |
|                     |                       |                         |                                |                       | 0.5                   | -0.0091 (-0.0127, -0.0054) | g.s.           |
|                     |                       |                         |                                |                       | 1                     | 0.0079 (-0.0001, 0.0158)   | n.s.           |
|                     |                       |                         |                                | EtOH:H <sub>2</sub> O | 0.1                   | -0.0018 (-0.0061, 0.0025)  | n.s.           |
|                     |                       |                         |                                |                       | 0.5                   | 0.0062 (-0.0007, 0.0130)   | n.s.           |
|                     |                       |                         |                                |                       | 1                     | 0.0018 (-0.0067, 0.0104)   | n.s.           |
|                     |                       |                         |                                | H <sub>2</sub> O      | 0.1                   | 0.0212 (0.0163, 0.0262)    | 10.6369        |
|                     |                       |                         |                                |                       | 0.5                   | 0.0169 (0.0125, 0.0213)    | n.s.           |
|                     |                       |                         |                                |                       | 1                     | 0.0082 (0.0041, 0.0122)    | 4.0948         |
|                     | <i>S. muticum</i>     | 0.1994 (0.1878, 0.2110) | 0.1447 (0.1294, 0.1600)        | <i>n</i> -hexane      | 0.1                   | 0.0094 (0.0044, 0.0145)    | 9.3807         |
|                     |                       |                         |                                |                       | 0.5                   | 0.0079 (-0.0007, 0.0165)   | n.s.           |
|                     |                       |                         |                                |                       | 1                     | 0.0343 (0.0292, 0.0395)    | 34.1352        |
|                     |                       |                         |                                | Ethyl acetate         | 0.1                   | -0.0042 (-0.0068, -0.0016) | g.s.           |
|                     |                       |                         |                                |                       | 0.5                   | 0.0149 (0.0080, 0.0218)    | 14.7913        |
|                     |                       |                         |                                |                       | 1                     | 0.0079 (-0.0008, 0.0166)   | n.s.           |
|                     |                       |                         |                                | EtOH                  | 0.1                   | 0.0105 (0.0053, 0.0158)    | 10.4672        |
|                     |                       |                         |                                |                       | 0.5                   | 0.0147 (0.0087, 0.0206)    | 14.5626        |
|                     |                       |                         |                                |                       | 1                     | 0.0089 (0.0021, 0.0156)    | 8.7992         |
|                     |                       |                         |                                | EtOH:H <sub>2</sub> O | 0.1                   | 0.0024 (-0.0034, 0.0082)   | n.s.           |
|                     |                       |                         |                                |                       | 0.5                   | 0.0024 (-0.0019, 0.0068)   | n.s.           |



| <i>Fungi</i>        | <i>Seaweed</i>    | GCR (mm/h)              | Amphotericin B (30 µg/mL) | Extract               | Concentration (mg/mL) | GIR (mm/h) (CI95)          | Inhibition (%) |
|---------------------|-------------------|-------------------------|---------------------------|-----------------------|-----------------------|----------------------------|----------------|
| <i>F. oxysporum</i> | <i>S. muticum</i> | 0.1994 (0.1878, 0.2110) | 0.1447 (0.1294, 0.1600)   | EtOH:H <sub>2</sub> O | 1                     | -0.0018 (-0.0088, 0.0053)  | n.s.           |
|                     |                   |                         |                           | H <sub>2</sub> O      | 0.1                   | 0.0129 (0.0075, 0.0183)    | 12.8231        |
|                     |                   |                         |                           |                       | 0.5                   | 0.0137 (0.0078, 0.0197)    | 13.6581        |
|                     |                   |                         |                           |                       | 1                     | 0.0082 (0.0020, 0.0144)    | 8.1928         |
| <i>P. expansum</i>  | <i>A. armata</i>  | 0.0610 (0.0602, 0.0618) | 0.0445 (0.0437, 0.0456)   | <i>n</i> -hexane      | 0.1                   | 0.0031 (0.0009, 0.0054)    | 5.1197         |
|                     |                   |                         |                           |                       | 0.5                   | 0.0055 (0.0037, 0.0073)    | 8.9951         |
|                     |                   |                         |                           |                       | 1                     | 0.0082 (0.0056, 0.011)     | 13.4852        |
|                     |                   |                         |                           | Ethyl acetate         | 0.1                   | 0.0051 (0.0030, 0.0073)    | 8.4311         |
|                     |                   |                         |                           |                       | 0.5                   | 0.0146 (0.0122, 0.0170)    | 23.9836        |
|                     |                   |                         |                           |                       | 1                     | 0.0272 (0.0235, 0.0309)    | 44.5902        |
|                     |                   |                         |                           | EtOH                  | 0.1                   | -0.0006 (-0.0016, 0.0004)  | n.s.           |
|                     |                   |                         |                           |                       | 0.5                   | 0.0033 (0.0021, 0.0045)    | 5.4180         |
|                     |                   |                         |                           |                       | 1                     | 0.0017 (0.0007, 0.0027)    | 2.7164         |
|                     |                   |                         |                           | EtOH:H <sub>2</sub> O | 0.1                   | 0.0042 (0.0034, 0.0051)    | 6.9180         |
|                     |                   |                         |                           |                       | 0.5                   | 0.0055 (0.0041, 0.0069)    | 9.0016         |
|                     |                   |                         |                           |                       | 1                     | 0.0036 (0.0022, 0.0050)    | 5.8590         |
|                     |                   |                         |                           | H <sub>2</sub> O      | 0.1                   | 0.0018 (0.0011, 0.0025)    | 2.9607         |
|                     |                   |                         |                           |                       | 0.5                   | -0.0001 (-0.0009, 0.0006)  | n.s.           |
|                     |                   |                         |                           |                       | 1                     | -0.0014 (-0.002, -0.0008)  | g.s.           |
|                     | <i>Codium</i> sp. | 0.0616 (0.0608, 0.0624) | 0.0452 (0.0442, 0.0462)   | <i>n</i> -hexane      | 0.1                   | -0.0091 (-0.0104, -0.0079) | g.s.           |
|                     |                   |                         |                           |                       | 0.5                   | 0.0027 (0.0004, 0.0050)    | 4.4017         |
|                     |                   |                         |                           |                       | 1                     | -0.0001 (-0.0011, 0.0010)  | n.s.           |
|                     |                   |                         |                           | Ethyl acetate         | 0.1                   | 0.0022 (0.0003, 0.004)     | 3.5834         |
|                     |                   |                         |                           |                       | 0.5                   | 0.0036 (0.0019, 0.0053)    | 5.8370         |
|                     |                   |                         |                           |                       | 1                     | 0.0106 (0.0079, 0.0132)    | 17.1456        |
|                     |                   |                         |                           | EtOH                  | 0.1                   | 0.0052 (0.0030, 0.0074)    | 8.3926         |

| <i>Fungi</i>       | <i>Seaweed</i>        | GCR (mm/h)              | Amphotericin B (30 µg/mL) | Extract               | Concentration (mg/mL) | GIR (mm/h) (CI95)          | Inhibition (%) |
|--------------------|-----------------------|-------------------------|---------------------------|-----------------------|-----------------------|----------------------------|----------------|
| <i>P. expansum</i> | <i>Codium</i> sp.     | 0.0616 (0.0608, 0.0624) | 0.0452 (0.0442, 0.0462)   | EtOH                  | 0.5                   | 0.0143 (0.0133, 0.0152)    | 23.1369        |
|                    |                       |                         |                           |                       | 1                     | 0.0034 (0.0020, 0.0049)    | 5.5837         |
|                    |                       |                         |                           | EtOH:H <sub>2</sub> O | 0.1                   | 0.0069 (0.0055, 0.0084)    | 11.2664        |
|                    |                       |                         |                           |                       | 0.5                   | 0.0125 (0.0110, 0.0140)    | 20.2468        |
|                    |                       |                         |                           |                       | 1                     | 0.0058 (0.0034, 0.0082)    | 9.3846         |
|                    |                       |                         |                           | H <sub>2</sub> O      | 0.1                   | 0.0016 (0.0005, 0.00265)   | 2.5183         |
|                    |                       |                         |                           |                       | 0.5                   | 0.0146 (0.01360, 0.0156)   | 23.7376        |
|                    |                       |                         |                           |                       | 1                     | -0.0038 (-0.0047, -0.0029) | g.s.           |
|                    | <i>F. vesiculosus</i> | 0.0100 (0.0966, 0.1034) | 0.0786 (0.0761, 0.0811)   | <i>n</i> -hexane      | 0.1                   | -0.0156 (-0.0175, -0.0137) | g.s.           |
|                    |                       |                         |                           |                       | 0.5                   | -0.0144 (-0.0161, -0.0127) | g.s.           |
|                    |                       |                         |                           |                       | 1                     | -0.0172 (-0.0194, -0.0150) | g.s.           |
|                    |                       |                         |                           | Ethyl acetate         | 0.1                   | -0.0074 (-0.0102, -0.0046) | g.s.           |
|                    |                       |                         |                           |                       | 0.5                   | -0.0135 (-0.0158, -0.0113) | g.s.           |
|                    |                       |                         |                           |                       | 1                     | -0.0169 (-0.0195, -0.0142) | g.s.           |
|                    |                       | 0.0610 (0.0602, 0.0618) | 0.0445 (0.0437, 0.0456)   | EtOH                  | 0.1                   | -0.0036 (-0.0043, -0.0028) | g.s.           |
|                    |                       |                         |                           |                       | 0.5                   | -0.0027 (-0.0039, -0.0015) | g.s.           |
|                    |                       |                         |                           |                       | 1                     | 0.0018 (-0.0004, 0.0041)   | n.s.           |
|                    |                       | 0.0100 (0.0966, 0.1034) | 0.0786 (0.0761, 0.0811)   | EtOH:H <sub>2</sub> O | 0.1                   | -0.0143 (-0.0157, -0.0128) | g.s.           |
|                    |                       |                         |                           |                       | 0.5                   | -0.0209 (-0.0228, -0.0189) | g.s.           |
|                    |                       |                         |                           |                       | 1                     | -0.0189 (-0.0207, -0.0171) | g.s.           |
|                    |                       |                         |                           | H <sub>2</sub> O      | 0.1                   | -0.0165 (-0.0179, -0.0152) | g.s.           |
|                    |                       |                         |                           |                       | 0.5                   | -0.0140 (-0.0160, -0.0120) | g.s.           |
|                    |                       |                         |                           |                       | 1                     | -0.0148 (-0.0163, -0.0134) | g.s.           |
|                    | <i>S. muticum</i>     | 0.0618 (0.0609, 0.0627) | 0.0455 (0.0444, 0.0465)   | <i>n</i> -hexane      | 0.1                   | 0.0075 (0.0049, 0.0101)    | 9.3074         |
|                    |                       |                         |                           |                       | 0.5                   | 0.0092 (0.0071, 0.0114)    | 14.9126        |
|                    |                       |                         |                           |                       | 1                     | 0.0197 (0.0165, 0.0228)    | 31.8123        |

| <i>Fungi</i>       | <i>Seaweed</i>    | GCR (mm/h)              | Amphotericin B (30 µg/mL) | Extract               | Concentration (mg/mL) | GIR (mm/h) (CI95)          | Inhibition (%) |
|--------------------|-------------------|-------------------------|---------------------------|-----------------------|-----------------------|----------------------------|----------------|
| <i>P. expansum</i> | <i>S. muticum</i> | 0.0618 (0.0609, 0.0627) | 0.0455 (0.0444, 0.0465)   | Ethyl acetate         | 0.1                   | -0.0079 (-0.0088, -0.0071) | g.s.           |
|                    |                   |                         |                           |                       | 0.5                   | -0.0064 (-0.0075, -0.0053) | g.s.           |
|                    |                   |                         |                           |                       | 1                     | -0.0058 (-0.0073, -0.0044) | g.s.           |
|                    |                   | 0.0809 (0.0744, 0.0874) | 0.0623 (0.0605, 0.0642)   | EtOH                  | 0.1                   | -0.0160 (-0.0178, -0.0143) | g.s.           |
|                    |                   |                         |                           |                       | 0.5                   | -0.0203 (-0.0227, -0.0179) | g.s.           |
|                    |                   |                         |                           |                       | 1                     | -0.0156 (-0.0185, -0.0126) | g.s.           |
|                    |                   |                         |                           | EtOH:H <sub>2</sub> O | 0.1                   | -0.0154 (-0.0175, -0.0134) | g.s.           |
|                    |                   |                         |                           |                       | 0.5                   | -0.0225 (-0.0251, -0.0198) | g.s.           |
|                    |                   |                         |                           |                       | 1                     | -0.0271 (-0.0298, -0.0245) | g.s.           |
|                    |                   |                         |                           | H <sub>2</sub> O      | 0.1                   | -0.0153 (-0.0167, -0.0139) | g.s.           |
|                    |                   |                         |                           |                       | 0.5                   | -0.0136 (-0.0148, -0.0124) | g.s.           |
|                    |                   |                         |                           |                       | 1                     | -0.0165 (-0.0179, -0.0151) | g.s.           |

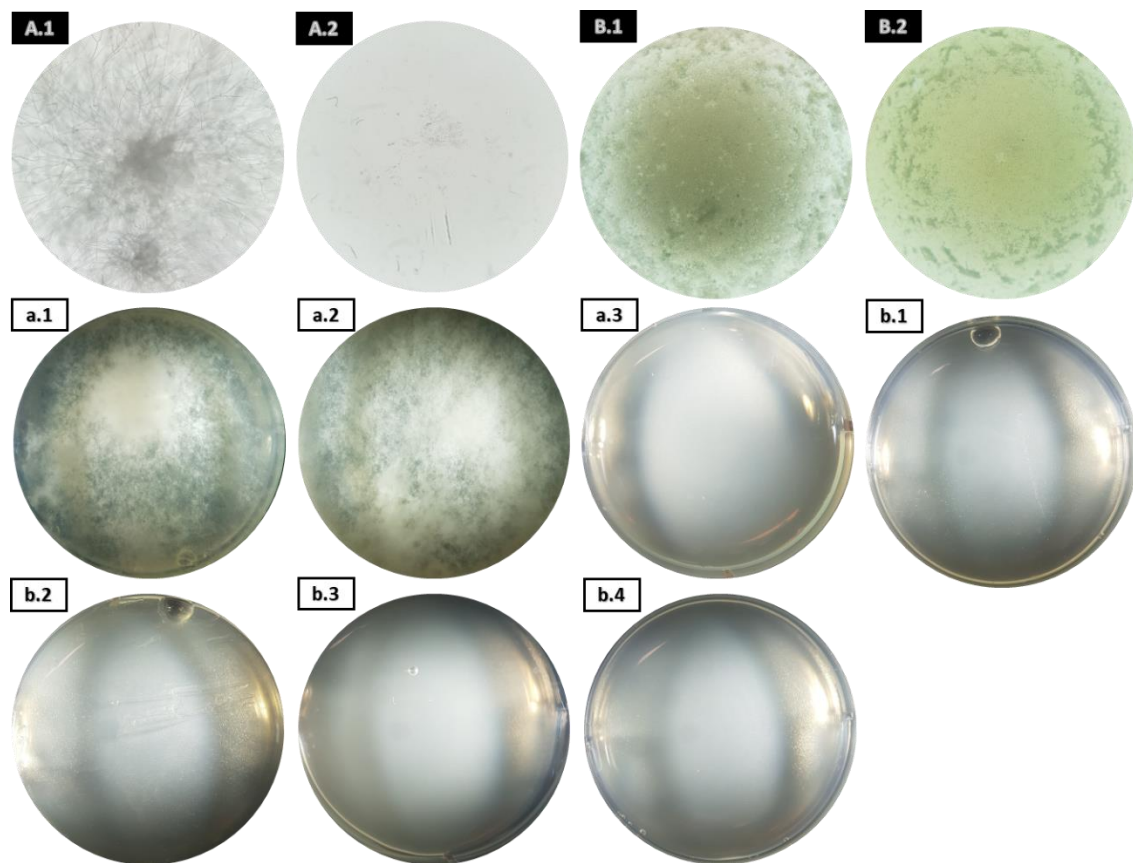

**Figure S1.** Representative examples of the spore germination inhibition of *Botrytis cinerea* by the *n*-hexane, ethyl acetate and ethanolic extracts of *Asparagopsis armata*. A and B are the MIC x 2 results, A.1: DMSO control (1 mg/mL); A.2: amphotericin B control (2  $\mu$ g/mL), B.1: ethyl acetate (1 mg/mL) and B.2: ethanol (1 mg/mL). The letters a and b are the MFC and MFC x 2 results, a.1: DMSO control (0.5 mg/mL); a.2: DMSO control (1 mg/mL); a.3: amphotericin B control (2  $\mu$ g/mL), b.1: *n*-hexane (1 mg/mL); b.2: ethyl acetate (1 mg/mL); b.3: ethanol (0.5 mg/mL) and b.4: ethanol (1 mg/mL).

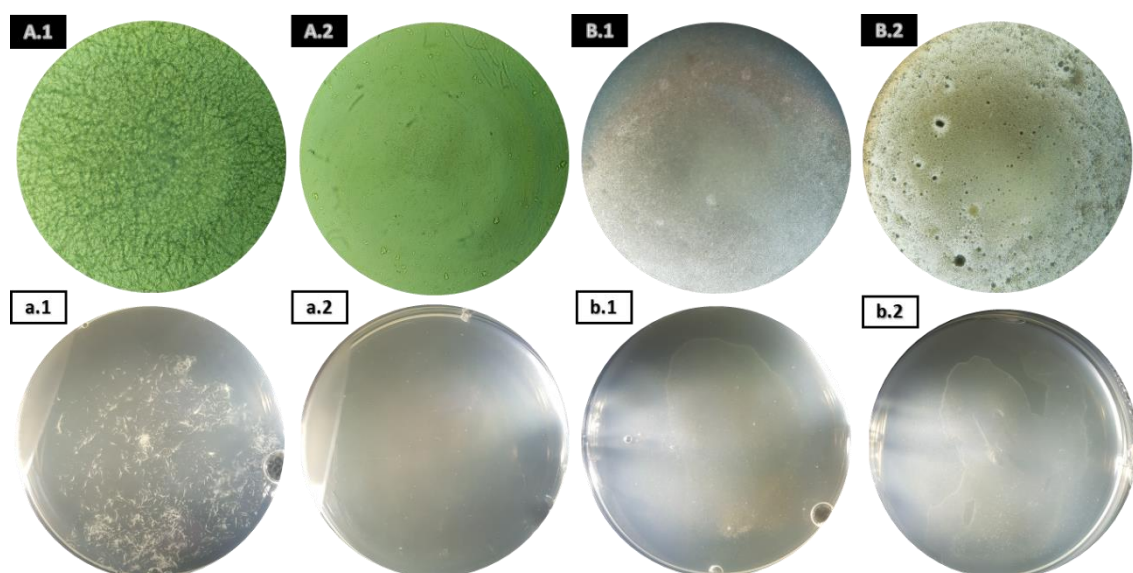

**Figure S2.** Representative examples of the spore germination inhibition of *Fusarium oxysporum* by the *n*-hexane, ethyl acetate and ethanolic extracts of *Asparagopsis armata*. A and B are the MIC x 2 results, A.1: DMSO control (1 mg/mL); A.2: amphotericin B control (2  $\mu$ g/mL), B.1: *n*-hexane (1 mg/mL) and B.2: ethyl acetate (1 mg/mL). The letters a and b are the MFC and MFC x 2 results, following the same correspondence of codes described for the MICs.

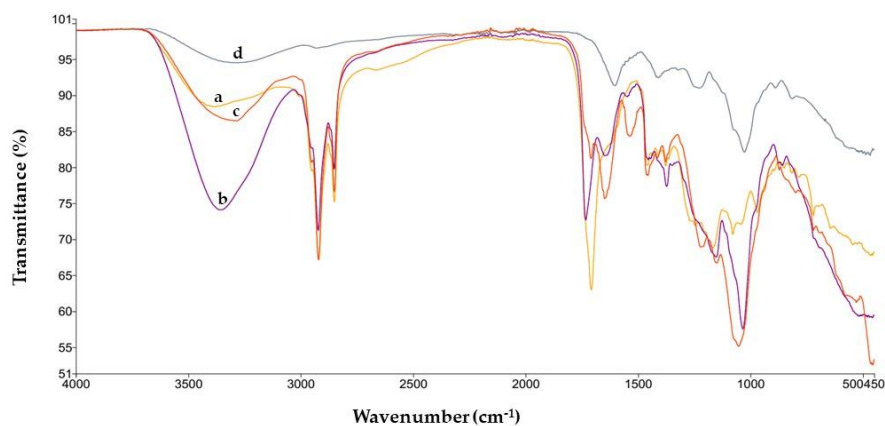

**Figure S3.** FTIR-ATR spectroscopy spectra of the ethyl acetate (a), ethanolic (b), and *n*-hexane (c) extracts of *Asparagopsis armata* (AA) and the aqueous extract (AQ) of *Sargassum muticum* (d).

**Table S2.** Estimates table of the linear general model for the relationship between decay halo's growth, time and treatments with the seaweeds' aqueous extracts against *Botrytis cinerea*. The ratio at which the curves vary depending on the treatments used and the influence of time (Estimate) are represented, followed by the standard error (Std. Error), *t* and *p* values, the estimates with the influence of the control (Value), the same value without the logarithm (Linear value) and the percentage of the stimulant (positive) or inhibitory (negative) effect on the fruit decay in comparison with the control. Negative percentages represent decay stimulation. Furthermore, significant differences are indicated with asterisks, where \* *p* < 0.05, \*\* *p* < 0.01 and \*\*\* *p* < 0.001.

|                            | Estimate | Std.<br>Error | <i>t</i><br>value | <i>p</i> value | Value  | Linear<br>value | Real effect<br>(%) |
|----------------------------|----------|---------------|-------------------|----------------|--------|-----------------|--------------------|
| Control                    | -3.077   | 0.236         | -13.05            | 0.000          | -3.077 | 0.046           | 0.000              |
| <i>Asparagopsis armata</i> | 0.481    | 0.121         | 3.971             | 0.000          | -2.596 | 0.075           | 61.799***          |
| <i>Codium sp.</i>          | 0.030    | 0.134         | 0.222             | 0.824          | -3.047 | 0.047           | 3.012              |
| <i>Fucus vesiculosus</i>   | -0.373   | 0.149         | -2.503            | 0.013          | -3.450 | 0.032           | -31.145*           |
| <i>Sargassum muticum</i>   | -0.849   | 0.174         | -4.883            | 0.000          | -3.926 | 0.020           | -57.213***         |
| Time (h)                   | 0.020    | 0.001         | 20.944            | 0.000          | -3.057 | 0.047           | 2.012***           |
| Observations               | 658      |               |                   |                |        |                 |                    |
| R <sup>2</sup> Nagelkerke  | 0.959    |               |                   |                |        |                 |                    |

**Table S3.** Estimates table of the linear general model for the relationship between decay halo's growth, time and treatments with the seaweeds' aqueous extracts against *Fusarium oxysporum*. The ratio at which the curves vary depending on the treatments used and the influence of time (Estimate) are represented, followed by the standard error (Std. Error), t and p values, the estimates with the influence of the control (Value), the same value without the logarithm (Linear value) and the percentage of the stimulant (positive) or inhibitory (negative) effect on the fruit decay in comparison with the control. Negative percentages represent decay stimulation. Furthermore, significant differences are indicated with asterisks, where \*  $p < 0.05$ , \*\*  $p < 0.01$  and \*\*\*  $p < 0.001$ .

|                            | Estimate | Std.<br>Error | t<br>value | p<br>value | Value  | Linear<br>value | Real effect<br>(%) |
|----------------------------|----------|---------------|------------|------------|--------|-----------------|--------------------|
| Control                    | -1.055   | 0.131         | -8.024     | 0.000      | -1.055 | 0.348           | 0.000              |
| <i>Asparagopsis armata</i> | 0.289    | 0.098         | 2.948      | 0.003      | -0.766 | 0.465           | 33.497**           |
| <i>Codium sp.</i>          | -0.456   | 0.118         | -3.847     | 0.000      | -1.511 | 0.221           | -36.603***         |
| <i>Fucus vesiculosus</i>   | 0.012    | 0.104         | 0.114      | 0.909      | -1.043 | 0.352           | 1.196              |
| <i>Sargassum muticum</i>   | 0.025    | 0.104         | 0.237      | 0.813      | -1.030 | 0.357           | 2.502              |
| Time (h)                   | 0.017    | 0.001         | 20.649     | 0.000      | -1.038 | 0.354           | 1.732***           |
| Observations               | 418      |               |            |            |        |                 |                    |
| R <sup>2</sup> Nagelkerke  | 0.828    |               |            |            |        |                 |                    |
